# Supplementary material for: Modeling resistance of colorectal peritoneal metastases to immune checkpoint blockade in humanized mice
Source: HighWire-hosted journal article supplement (doi:10.1136/jitc-2022-005345), 2022-12-01
Supplement: jitc-2022-005345supp017_data_supplement.xlsx [file jitc-2022-005345supp017_data_supplement.xlsx]

## Sheet: Sheet1
GOID	GOTerm	Term PValue Corrected with Bonferroni step down	Group PValue	Group PValue Corrected with Bonferroni step down	% Associated Genes	Nr. Genes	Associated Genes Found
GO:0006614	SRP-dependent cotranslational protein targeting to membrane	6.0886e-14	4.68224e-11	4.68224e-10	15.0943	16	[RPL12, RPL13, RPL17, RPL18A, RPL28, RPL29, RPL30, RPL35, RPL36, RPL37A, RPL41, RPS10, RPS14, RPS23, RPS27, RPS3]
GO:0006613	cotranslational protein targeting to membrane	1.11583e-13	4.68224e-11	4.68224e-10	14.5455	16	[RPL12, RPL13, RPL17, RPL18A, RPL28, RPL29, RPL30, RPL35, RPL36, RPL37A, RPL41, RPS10, RPS14, RPS23, RPS27, RPS3]
GO:0016032	viral process	2.16306e-13	4.68224e-11	4.68224e-10	3.8342	37	[CD4, CD93, CXCL8, GRB2, HLA-DRA, HLA-DRB1, HLA-E, HSPA1B, ICAM1, IFITM1, IFITM3, KCTD5, KPNA4, NDUFA13, OAS3, PPIH, PSMB3, PSMB9, RPL12, RPL13, RPL17, RPL18A, RPL28, RPL29, RPL30, RPL35, RPL36, RPL37A, RPL41, RPS10, RPS14, RPS23, RPS27, RPS3, RTRAF, UBC, WWP2]
GO:0045047	protein targeting to ER	4.58612e-13	4.68224e-11	4.68224e-10	13.3333	16	[RPL12, RPL13, RPL17, RPL18A, RPL28, RPL29, RPL30, RPL35, RPL36, RPL37A, RPL41, RPS10, RPS14, RPS23, RPS27, RPS3]
GO:0072599	establishment of protein localization to endoplasmic reticulum	7.77086e-13	4.68224e-11	4.68224e-10	12.9032	16	[RPL12, RPL13, RPL17, RPL18A, RPL28, RPL29, RPL30, RPL35, RPL36, RPL37A, RPL41, RPS10, RPS14, RPS23, RPS27, RPS3]
GO:0000184	nuclear-transcribed mRNA catabolic process, nonsense-mediated decay	1.65896e-12	4.68224e-11	4.68224e-10	12.3077	16	[RPL12, RPL13, RPL17, RPL18A, RPL28, RPL29, RPL30, RPL35, RPL36, RPL37A, RPL41, RPS10, RPS14, RPS23, RPS27, RPS3]
GO:0070972	protein localization to endoplasmic reticulum	1.80219e-11	4.68224e-11	4.68224e-10	10.596	16	[RPL12, RPL13, RPL17, RPL18A, RPL28, RPL29, RPL30, RPL35, RPL36, RPL37A, RPL41, RPS10, RPS14, RPS23, RPS27, RPS3]
GO:0019083	viral transcription	5.26674e-11	4.68224e-11	4.68224e-10	8.90052	17	[IFITM3, RPL12, RPL13, RPL17, RPL18A, RPL28, RPL29, RPL30, RPL35, RPL36, RPL37A, RPL41, RPS10, RPS14, RPS23, RPS27, RPS3]
GO:0019080	viral gene expression	2.28487e-10	4.68224e-11	4.68224e-10	8.13397	17	[IFITM3, RPL12, RPL13, RPL17, RPL18A, RPL28, RPL29, RPL30, RPL35, RPL36, RPL37A, RPL41, RPS10, RPS14, RPS23, RPS27, RPS3]
GO:0006612	protein targeting to membrane	4.84726e-10	4.68224e-11	4.68224e-10	7.76256	17	[PRNP, RPL12, RPL13, RPL17, RPL18A, RPL28, RPL29, RPL30, RPL35, RPL36, RPL37A, RPL41, RPS10, RPS14, RPS23, RPS27, RPS3]
GO:0072594	establishment of protein localization to organelle	1.03683e-09	4.68224e-11	4.68224e-10	4.18006	26	[ATAD1, CSNK2A2, GZMB, HK1, KPNA4, NDUFA13, PIPOX, RPL12, RPL13, RPL17, RPL18A, RPL28, RPL29, RPL30, RPL35, RPL36, RPL37A, RPL41, RPS10, RPS14, RPS23, RPS27, RPS3, SAMM50, UBC, ZPR1]
GO:0006401	RNA catabolic process	1.12778e-09	4.68224e-11	4.68224e-10	5.10441	22	[HSPA1B, PSMB3, PSMB9, PSMC5, RPL12, RPL13, RPL17, RPL18A, RPL28, RPL29, RPL30, RPL35, RPL36, RPL37A, RPL41, RPS10, RPS14, RPS23, RPS27, RPS3, UBC, ZPR1]
GO:0006402	mRNA catabolic process	1.17667e-09	4.68224e-11	4.68224e-10	5.41237	21	[HSPA1B, PSMB3, PSMB9, PSMC5, RPL12, RPL13, RPL17, RPL18A, RPL28, RPL29, RPL30, RPL35, RPL36, RPL37A, RPL41, RPS10, RPS14, RPS23, RPS27, RPS3, UBC]
GO:0006413	translational initiation	1.99412e-09	4.68224e-11	4.68224e-10	7.80488	16	[RPL12, RPL13, RPL17, RPL18A, RPL28, RPL29, RPL30, RPL35, RPL36, RPL37A, RPL41, RPS10, RPS14, RPS23, RPS27, RPS3]
GO:0090150	establishment of protein localization to membrane	2.80204e-09	4.68224e-11	4.68224e-10	5.50964	20	[GZMB, NDUFA13, PRNP, RPL12, RPL13, RPL17, RPL18A, RPL28, RPL29, RPL30, RPL35, RPL36, RPL37A, RPL41, RPS10, RPS14, RPS23, RPS27, RPS3, SAMM50]
GO:0006605	protein targeting	5.06304e-09	4.68224e-11	4.68224e-10	4.72103	22	[CSNK2A2, NDUFA13, PIPOX, PRNP, RPL12, RPL13, RPL17, RPL18A, RPL28, RPL29, RPL30, RPL35, RPL36, RPL37A, RPL41, RPS10, RPS14, RPS23, RPS27, RPS3, SAMM50, UBC]
GO:0000956	nuclear-transcribed mRNA catabolic process	5.33329e-09	4.68224e-11	4.68224e-10	7.30594	16	[RPL12, RPL13, RPL17, RPL18A, RPL28, RPL29, RPL30, RPL35, RPL36, RPL37A, RPL41, RPS10, RPS14, RPS23, RPS27, RPS3]
GO:0043043	peptide biosynthetic process	2.16069e-08	4.68224e-11	4.68224e-10	3.63636	26	[EEF1G, FARSA, GZMB, HNRNPL, MRPL24, MRPL4, MRPS18B, PRNP, PTAFR, RPL12, RPL13, RPL17, RPL18A, RPL28, RPL29, RPL30, RPL35, RPL36, RPL37A, RPL41, RPS10, RPS14, RPS23, RPS27, RPS3, WARS1]
GO:0006412	translation	4.90696e-08	4.68224e-11	4.68224e-10	3.64431	25	[EEF1G, FARSA, GZMB, HNRNPL, MRPL24, MRPL4, MRPS18B, PTAFR, RPL12, RPL13, RPL17, RPL18A, RPL28, RPL29, RPL30, RPL35, RPL36, RPL37A, RPL41, RPS10, RPS14, RPS23, RPS27, RPS3, WARS1]
GO:0043604	amide biosynthetic process	7.01892e-08	4.68224e-11	4.68224e-10	3.2	28	[EEF1G, FARSA, GZMB, HNRNPL, MRPL24, MRPL4, MRPS18B, PRNP, PTAFR, RPL12, RPL13, RPL17, RPL18A, RPL28, RPL29, RPL30, RPL35, RPL36, RPL37A, RPL41, RPS10, RPS14, RPS23, RPS27, RPS3, SPHK2, ST6GALNAC6, WARS1]
GO:0019221	cytokine-mediated signaling pathway	1.11191e-07	3.67538e-09	3.30784e-08	3.24519	27	[CARD16, CD4, CNN2, CXCL8, GRB2, HLA-DRA, HLA-DRB1, HLA-DRB5, HLA-E, HSPA1B, ICAM1, IFI6, IFIT2, IFITM1, IFITM3, IFNGR2, IL32, LCP1, MT2A, OAS3, PSMB3, PSMB9, PSMC5, PTAFR, TMSB4X, UBC, ZBP1]
GO:0034655	nucleobase-containing compound catabolic process	2.80573e-07	4.68224e-11	4.68224e-10	3.81282	22	[HSPA1B, PSMB3, PSMB9, PSMC5, RPL12, RPL13, RPL17, RPL18A, RPL28, RPL29, RPL30, RPL35, RPL36, RPL37A, RPL41, RPS10, RPS14, RPS23, RPS27, RPS3, UBC, ZPR1]
GO:0006518	peptide metabolic process	3.28841e-07	4.68224e-11	4.68224e-10	3.08571	27	[CTSH, EEF1G, FARSA, GZMB, HNRNPL, MRPL24, MRPL4, MRPS18B, PRNP, PTAFR, RPL12, RPL13, RPL17, RPL18A, RPL28, RPL29, RPL30, RPL35, RPL36, RPL37A, RPL41, RPS10, RPS14, RPS23, RPS27, RPS3, WARS1]
GO:0016071	mRNA metabolic process	4.27945e-07	4.68224e-11	4.68224e-10	3.0474	27	[AHCYL1, GCFC2, HNRNPL, HSPA1B, PPIH, PSMB3, PSMB9, PSMC5, RPL12, RPL13, RPL17, RPL18A, RPL28, RPL29, RPL30, RPL35, RPL36, RPL37A, RPL41, RPS10, RPS14, RPS23, RPS27, RPS3, TSEN15, UBC, ZPR1]
GO:1901361	organic cyclic compound catabolic process	1.26683e-06	4.68224e-11	4.68224e-10	3.35766	23	[HSPA1B, PSMB3, PSMB9, PSMC5, RPL12, RPL13, RPL17, RPL18A, RPL28, RPL29, RPL30, RPL35, RPL36, RPL37A, RPL41, RPS10, RPS14, RPS23, RPS27, RPS3, SNX17, UBC, ZPR1]
GO:0046700	heterocycle catabolic process	1.40973e-06	4.68224e-11	4.68224e-10	3.48653	22	[HSPA1B, PSMB3, PSMB9, PSMC5, RPL12, RPL13, RPL17, RPL18A, RPL28, RPL29, RPL30, RPL35, RPL36, RPL37A, RPL41, RPS10, RPS14, RPS23, RPS27, RPS3, UBC, ZPR1]
GO:0044270	cellular nitrogen compound catabolic process	1.57119e-06	4.68224e-11	4.68224e-10	3.46457	22	[HSPA1B, PSMB3, PSMB9, PSMC5, RPL12, RPL13, RPL17, RPL18A, RPL28, RPL29, RPL30, RPL35, RPL36, RPL37A, RPL41, RPS10, RPS14, RPS23, RPS27, RPS3, UBC, ZPR1]
GO:0019439	aromatic compound catabolic process	2.37831e-06	4.68224e-11	4.68224e-10	3.38462	22	[HSPA1B, PSMB3, PSMB9, PSMC5, RPL12, RPL13, RPL17, RPL18A, RPL28, RPL29, RPL30, RPL35, RPL36, RPL37A, RPL41, RPS10, RPS14, RPS23, RPS27, RPS3, UBC, ZPR1]
GO:0072657	protein localization to membrane	6.50335e-06	4.68224e-11	4.68224e-10	3.19767	22	[FAM126A, GZMB, NDUFA13, PRNP, RPL12, RPL13, RPL17, RPL18A, RPL28, RPL29, RPL30, RPL35, RPL36, RPL37A, RPL41, RPS10, RPS14, RPS23, RPS27, RPS3, SAMM50, TMED2]
GO:0060333	interferon-gamma-mediated signaling pathway	1.58281e-05	3.67538e-09	3.30784e-08	9.27835	9	[HLA-DRA, HLA-DRB1, HLA-DRB5, HLA-E, ICAM1, IFNGR2, MT2A, OAS3, PTAFR]
GO:0034341	response to interferon-gamma	0.000238078	3.67538e-09	3.30784e-08	5.14019	11	[HLA-DRA, HLA-DRB1, HLA-DRB5, HLA-E, ICAM1, IFITM1, IFITM3, IFNGR2, MT2A, OAS3, PTAFR]
GO:0050852	T cell receptor signaling pathway	0.000323995	1.51063e-05	0.000105744	4.97738	11	[CD3E, CD4, HLA-DRA, HLA-DRB1, HLA-DRB5, PRNP, PSMB3, PSMB9, PSMC5, RPS3, STK11]
GO:0002478	antigen processing and presentation of exogenous peptide antigen	0.000459106	1.10193e-08	8.81548e-08	5.40541	10	[CAPZB, CYBA, CYBB, HLA-DRA, HLA-DRB1, HLA-DRB5, HLA-E, PSMB3, PSMB9, PSMC5]
GO:0002478	antigen processing and presentation of exogenous peptide antigen	0.000459106	1.51063e-05	0.000105744	5.40541	10	[CAPZB, CYBA, CYBB, HLA-DRA, HLA-DRB1, HLA-DRB5, HLA-E, PSMB3, PSMB9, PSMC5]
GO:0044409	entry into host	0.000589878	2.13174e-05	0.000106587	6.04027	9	[CD4, CXCL8, GRB2, HLA-DRB1, HSPA1B, ICAM1, IFITM1, IFITM3, WWP2]
GO:0019884	antigen processing and presentation of exogenous antigen	0.000693565	1.10193e-08	8.81548e-08	5.15464	10	[CAPZB, CYBA, CYBB, HLA-DRA, HLA-DRB1, HLA-DRB5, HLA-E, PSMB3, PSMB9, PSMC5]
GO:0019884	antigen processing and presentation of exogenous antigen	0.000693565	1.51063e-05	0.000105744	5.15464	10	[CAPZB, CYBA, CYBB, HLA-DRA, HLA-DRB1, HLA-DRB5, HLA-E, PSMB3, PSMB9, PSMC5]
GO:0048002	antigen processing and presentation of peptide antigen	0.00107621	1.10193e-08	8.81548e-08	4.90196	10	[CAPZB, CYBA, CYBB, HLA-DRA, HLA-DRB1, HLA-DRB5, HLA-E, PSMB3, PSMB9, PSMC5]
GO:0048002	antigen processing and presentation of peptide antigen	0.00107621	1.51063e-05	0.000105744	4.90196	10	[CAPZB, CYBA, CYBB, HLA-DRA, HLA-DRB1, HLA-DRB5, HLA-E, PSMB3, PSMB9, PSMC5]
GO:0001666	response to hypoxia	0.00194477	1.10193e-08	8.81548e-08	3.46667	13	[CARD16, CYBA, CYBB, CYGB, ENO1, ICAM1, LIMD1, NOS1, PSMB3, PSMB9, PSMC5, SLC2A1, UBC]
GO:0071357	cellular response to type I interferon	0.00212141	1.72245e-05	0.000103347	7.29167	7	[HLA-E, IFI6, IFIT2, IFITM1, IFITM3, OAS3, ZBP1]
GO:0060337	type I interferon signaling pathway	0.00212141	1.72245e-05	0.000103347	7.29167	7	[HLA-E, IFI6, IFIT2, IFITM1, IFITM3, OAS3, ZBP1]
GO:0051701	interaction with host	0.00212911	2.13174e-05	0.000106587	4.52489	10	[CD4, CXCL8, GRB2, HLA-DRB1, HSPA1B, ICAM1, IFITM1, IFITM3, KPNA4, WWP2]
GO:0052126	movement in host environment	0.00229903	2.13174e-05	0.000106587	5.08475	9	[CD4, CXCL8, GRB2, HLA-DRB1, HSPA1B, ICAM1, IFITM1, IFITM3, WWP2]
GO:0034340	response to type I interferon	0.00270424	1.72245e-05	0.000103347	7	7	[HLA-E, IFI6, IFIT2, IFITM1, IFITM3, OAS3, ZBP1]
GO:0036293	response to decreased oxygen levels	0.00271907	1.10193e-08	8.81548e-08	3.35052	13	[CARD16, CYBA, CYBB, CYGB, ENO1, ICAM1, LIMD1, NOS1, PSMB3, PSMB9, PSMC5, SLC2A1, UBC]
GO:0052372	modulation by symbiont of entry into host	0.0043361	2.13174e-05	0.000106587	11.3636	5	[CD4, CXCL8, HLA-DRB1, IFITM1, IFITM3]
GO:0071346	cellular response to interferon-gamma	0.00463784	3.67538e-09	3.30784e-08	4.63918	9	[HLA-DRA, HLA-DRB1, HLA-DRB5, HLA-E, ICAM1, IFNGR2, MT2A, OAS3, PTAFR]
GO:0002181	cytoplasmic translation	0.00522535	4.68224e-11	4.68224e-10	6.30631	7	[RPL17, RPL18A, RPL29, RPL30, RPL36, RPL41, RPS23]
GO:0070482	response to oxygen levels	0.00530739	1.10193e-08	8.81548e-08	3.13253	13	[CARD16, CYBA, CYBB, CYGB, ENO1, ICAM1, LIMD1, NOS1, PSMB3, PSMB9, PSMC5, SLC2A1, UBC]
GO:0002479	antigen processing and presentation of exogenous peptide antigen via MHC class I, TAP-dependent	0.00722409	1.10193e-08	8.81548e-08	7.5	6	[CYBA, CYBB, HLA-E, PSMB3, PSMB9, PSMC5]
GO:0002479	antigen processing and presentation of exogenous peptide antigen via MHC class I, TAP-dependent	0.00722409	1.51063e-05	0.000105744	7.5	6	[CYBA, CYBB, HLA-E, PSMB3, PSMB9, PSMC5]
GO:0071456	cellular response to hypoxia	0.00869751	1.10193e-08	8.81548e-08	4.2654	9	[CARD16, CYBB, ENO1, ICAM1, LIMD1, PSMB3, PSMB9, PSMC5, UBC]
GO:0042590	antigen processing and presentation of exogenous peptide antigen via MHC class I	0.0100364	1.10193e-08	8.81548e-08	7.05882	6	[CYBA, CYBB, HLA-E, PSMB3, PSMB9, PSMC5]
GO:0042590	antigen processing and presentation of exogenous peptide antigen via MHC class I	0.0100364	1.51063e-05	0.000105744	7.05882	6	[CYBA, CYBB, HLA-E, PSMB3, PSMB9, PSMC5]
GO:0034612	response to tumor necrosis factor	0.0106435	1.10193e-08	8.81548e-08	3.38462	11	[CARD16, CXCL8, CYBA, HSPA1B, ICAM1, PRNP, PSMB3, PSMB9, PSMC5, RPS3, TMSB4X]
GO:0036294	cellular response to decreased oxygen levels	0.0120902	1.10193e-08	8.81548e-08	4.0724	9	[CARD16, CYBB, ENO1, ICAM1, LIMD1, PSMB3, PSMB9, PSMC5, UBC]
GO:0032640	tumor necrosis factor production	0.012158	0.000100335	0.000301004	4.65116	8	[ACP5, CYBA, CYBB, HLA-E, LCP1, NFKBIL1, PTAFR, SPHK2]
GO:0071706	tumor necrosis factor superfamily cytokine production	0.0146489	0.000100335	0.000301004	4.51977	8	[ACP5, CYBA, CYBB, HLA-E, LCP1, NFKBIL1, PTAFR, SPHK2]
GO:0046718	viral entry into host cell	0.0155368	2.13174e-05	0.000106587	5.26316	7	[CD4, HLA-DRB1, HSPA1B, ICAM1, IFITM1, IFITM3, WWP2]
GO:0019058	viral life cycle	0.0183664	2.13174e-05	0.000106587	3.17003	11	[CD4, CXCL8, HLA-DRB1, HSPA1B, ICAM1, IFITM1, IFITM3, OAS3, PPIH, UBC, WWP2]
GO:0071453	cellular response to oxygen levels	0.0213048	1.10193e-08	8.81548e-08	3.76569	9	[CARD16, CYBB, ENO1, ICAM1, LIMD1, PSMB3, PSMB9, PSMC5, UBC]
GO:0050851	antigen receptor-mediated signaling pathway	0.0226515	1.51063e-05	0.000105744	3.08989	11	[CD3E, CD4, HLA-DRA, HLA-DRB1, HLA-DRB5, PRNP, PSMB3, PSMB9, PSMC5, RPS3, STK11]
GO:0071356	cellular response to tumor necrosis factor	0.0244602	1.10193e-08	8.81548e-08	3.33333	10	[CARD16, CXCL8, CYBA, HSPA1B, ICAM1, PSMB3, PSMB9, PSMC5, RPS3, TMSB4X]
GO:0002474	antigen processing and presentation of peptide antigen via MHC class I	0.0257608	1.10193e-08	8.81548e-08	5.88235	6	[CYBA, CYBB, HLA-E, PSMB3, PSMB9, PSMC5]
GO:0002474	antigen processing and presentation of peptide antigen via MHC class I	0.0257608	1.51063e-05	0.000105744	5.88235	6	[CYBA, CYBB, HLA-E, PSMB3, PSMB9, PSMC5]
GO:0032271	regulation of protein polymerization	0.0273112	6.45415e-05	0.000258166	3.62903	9	[ARPC4, CAPG, CAPZB, GRB2, HSPA1B, ICAM1, PFN1, RPS3, TMSB4X]
GO:0050848	regulation of calcium-mediated signaling	0.0297503	0.000215582	0.000431164	5.71429	6	[CD3E, CD4, FKBP1A, NOS1, PRNP, TBC1D10C]
GO:0046596	regulation of viral entry into host cell	0.030702	2.13174e-05	0.000106587	10.8108	4	[CD4, HLA-DRB1, IFITM1, IFITM3]
GO:0008064	regulation of actin polymerization or depolymerization	0.0316009	6.45415e-05	0.000258166	4	8	[ARPC4, CAPG, CAPZB, GRB2, ICAM1, PFN1, SWAP70, TMSB4X]
GO:0030832	regulation of actin filament length	0.0324477	6.45415e-05	0.000258166	3.9801	8	[ARPC4, CAPG, CAPZB, GRB2, ICAM1, PFN1, SWAP70, TMSB4X]
GO:1903900	regulation of viral life cycle	0.0448774	2.13174e-05	0.000106587	4.375	7	[CD4, CXCL8, HLA-DRB1, IFITM1, IFITM3, OAS3, PPIH]
GO:0048010	vascular endothelial growth factor receptor signaling pathway	0.0468512	1.10193e-08	8.81548e-08	3.0303	3	[CYBA, CYBB, PTK2]
GO:0062207	regulation of pattern recognition receptor signaling pathway	0.0468512	0.0468512	0.0468512	3.0303	3	[CYBA, HSPA1B, NFKBIL1]
GO:0060071	Wnt signaling pathway, planar cell polarity pathway	0.0491462	1.10193e-08	8.81548e-08	5.17241	6	[NPHP3, PFN1, PSMB3, PSMB9, PSMC5, VANGL1]
