# Supplementary figures and images for: Modeling resistance of colorectal peritoneal metastases to immune checkpoint blockade in humanized mice
Source: HighWire-hosted journal article supplement (doi:10.1136/jitc-2022-005345), 2022-12-01

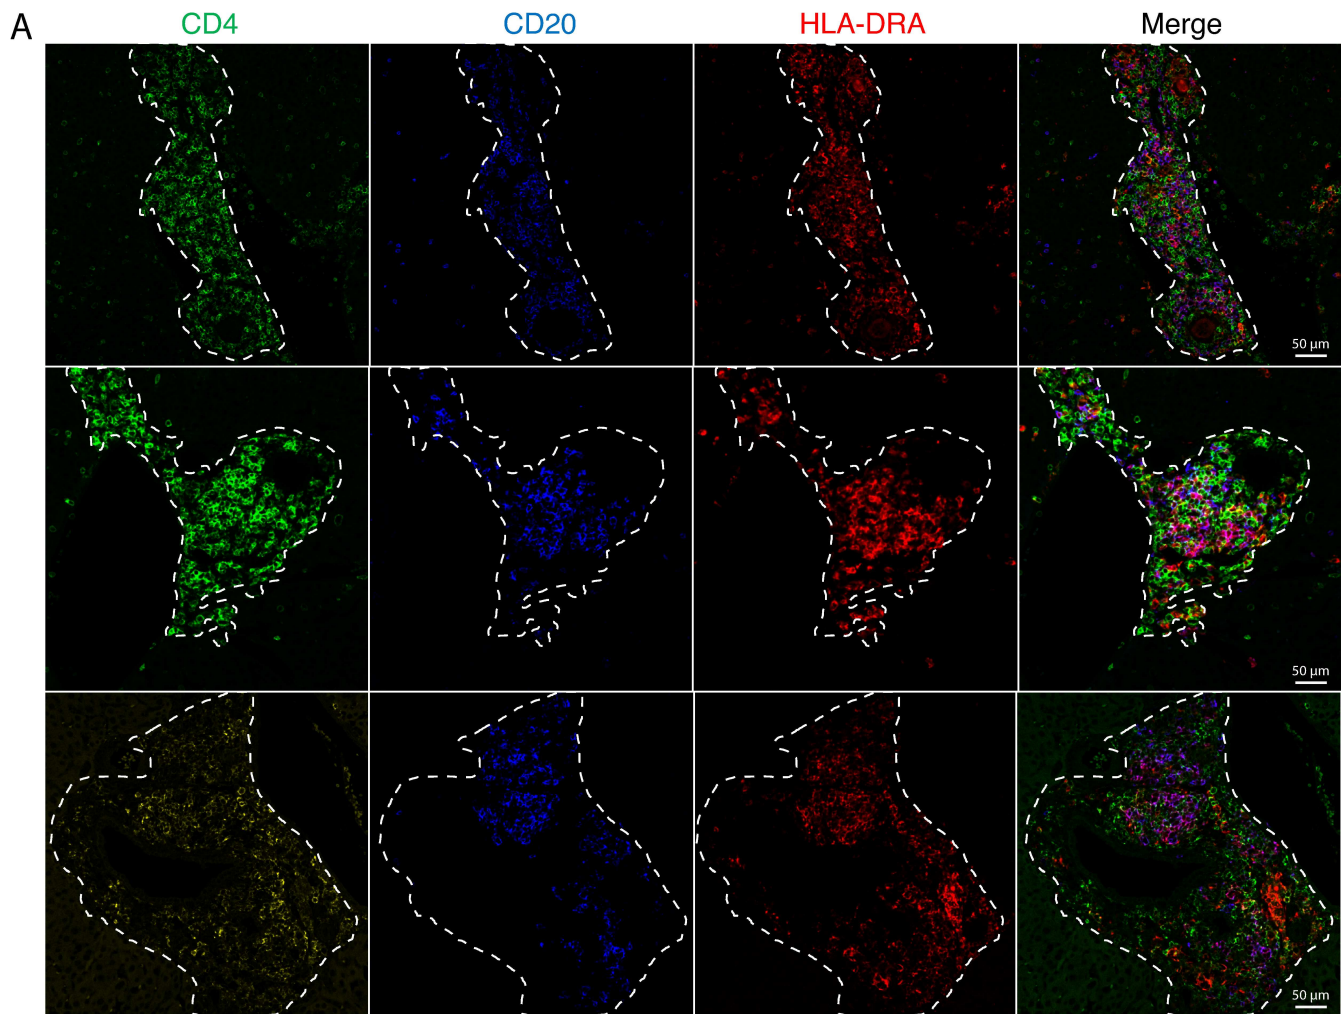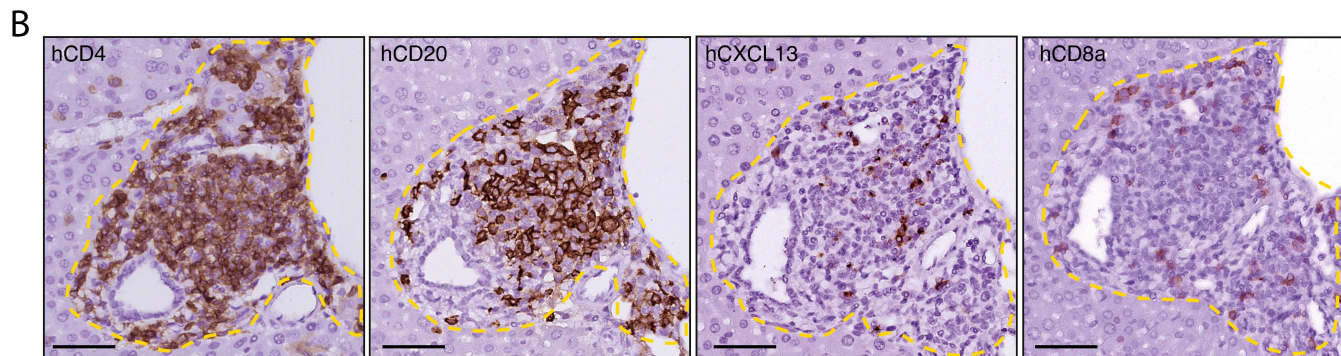

Supplement: jitc-2022-005345supp013_data_supplement.pdf [file jitc-2022-005345supp013_data_supplement.pdf]

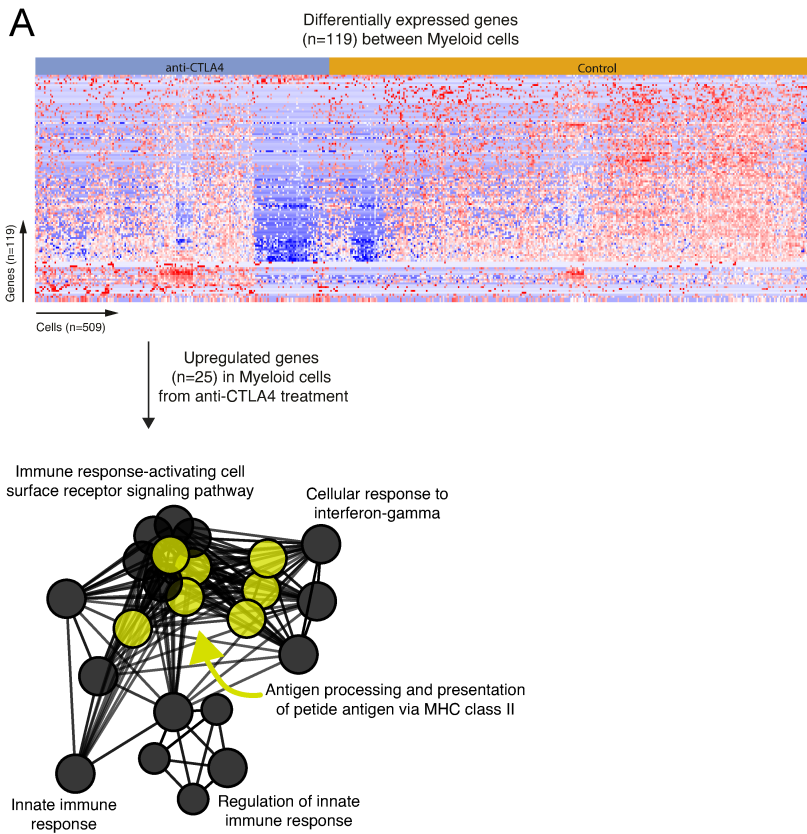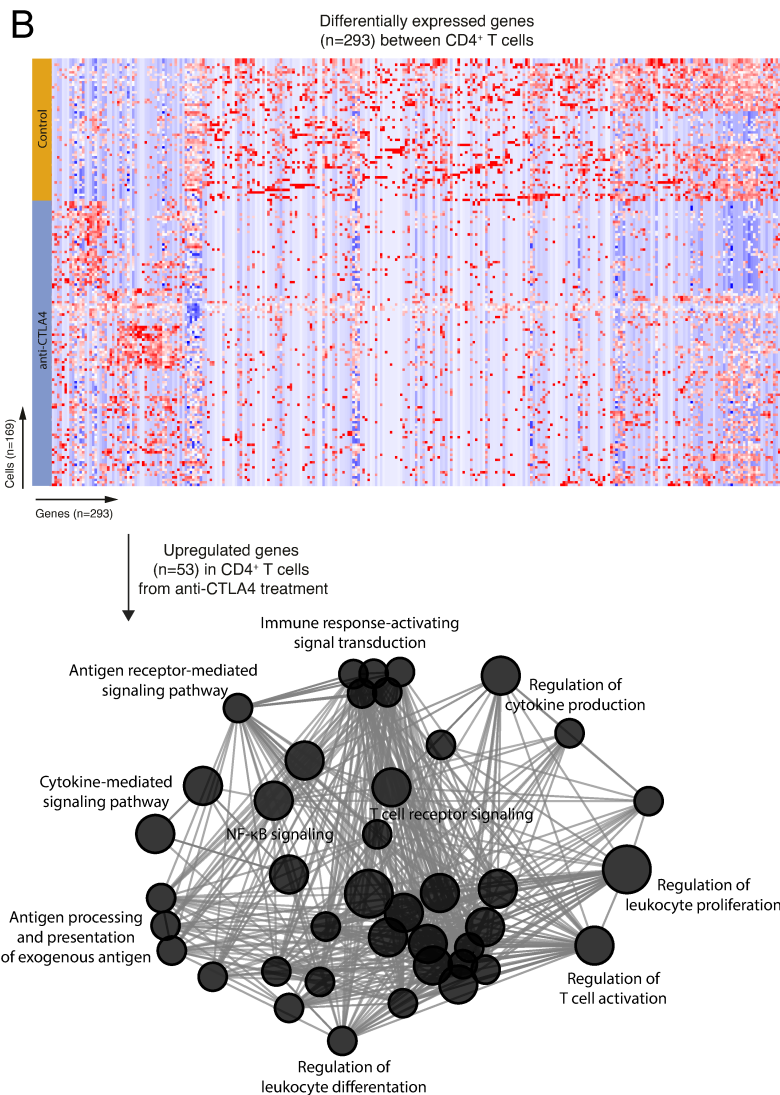

Supplement: jitc-2022-005345supp014_data_supplement.pdf [file jitc-2022-005345supp014_data_supplement.pdf]

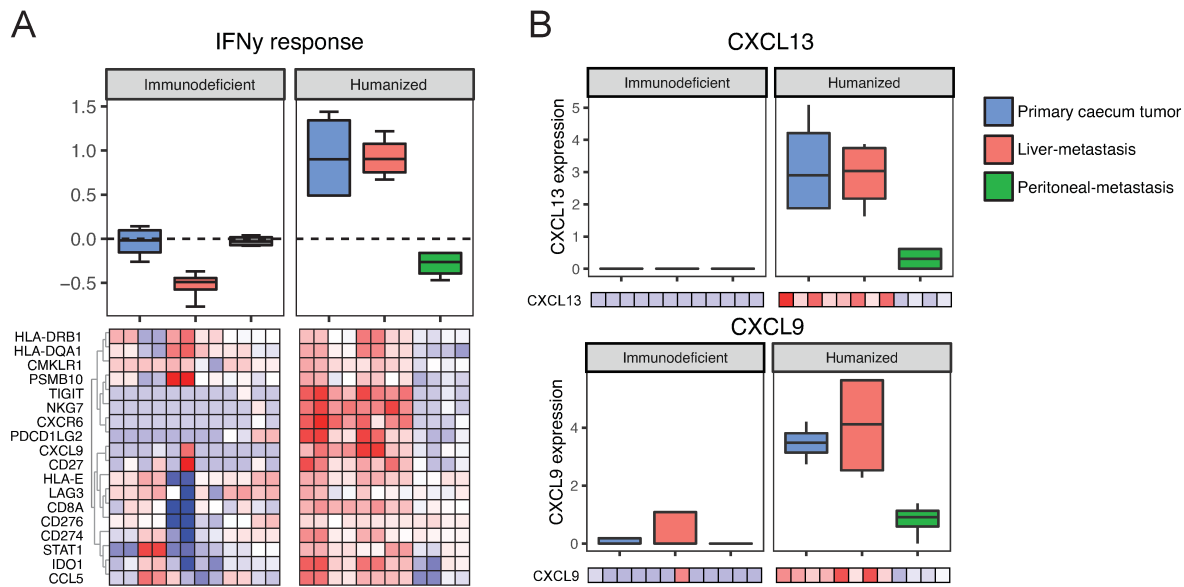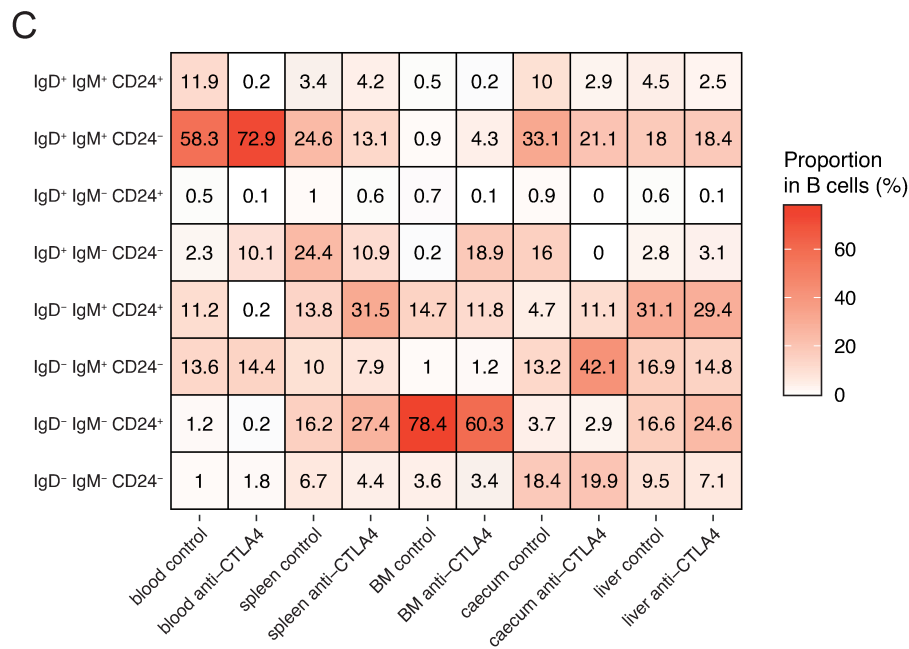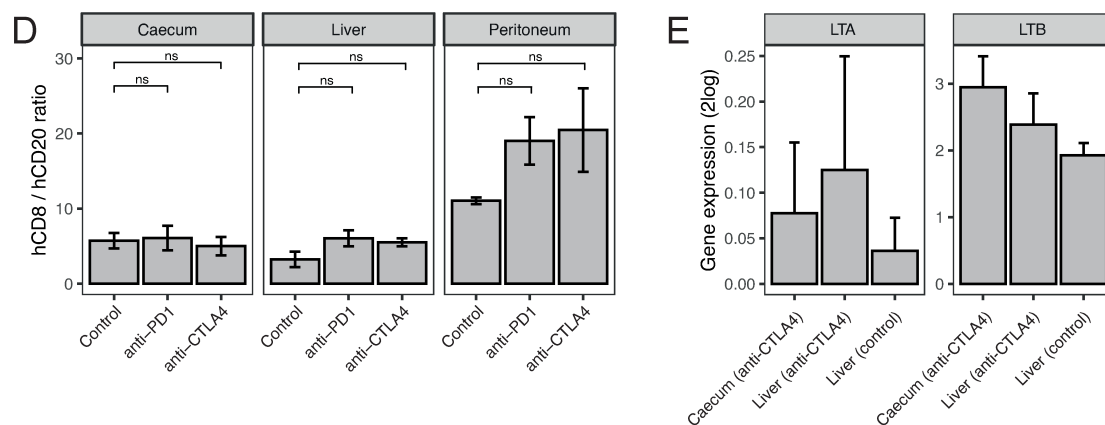

Supplement: jitc-2022-005345supp007_data_supplement.pdf [file jitc-2022-005345supp007_data_supplement.pdf]

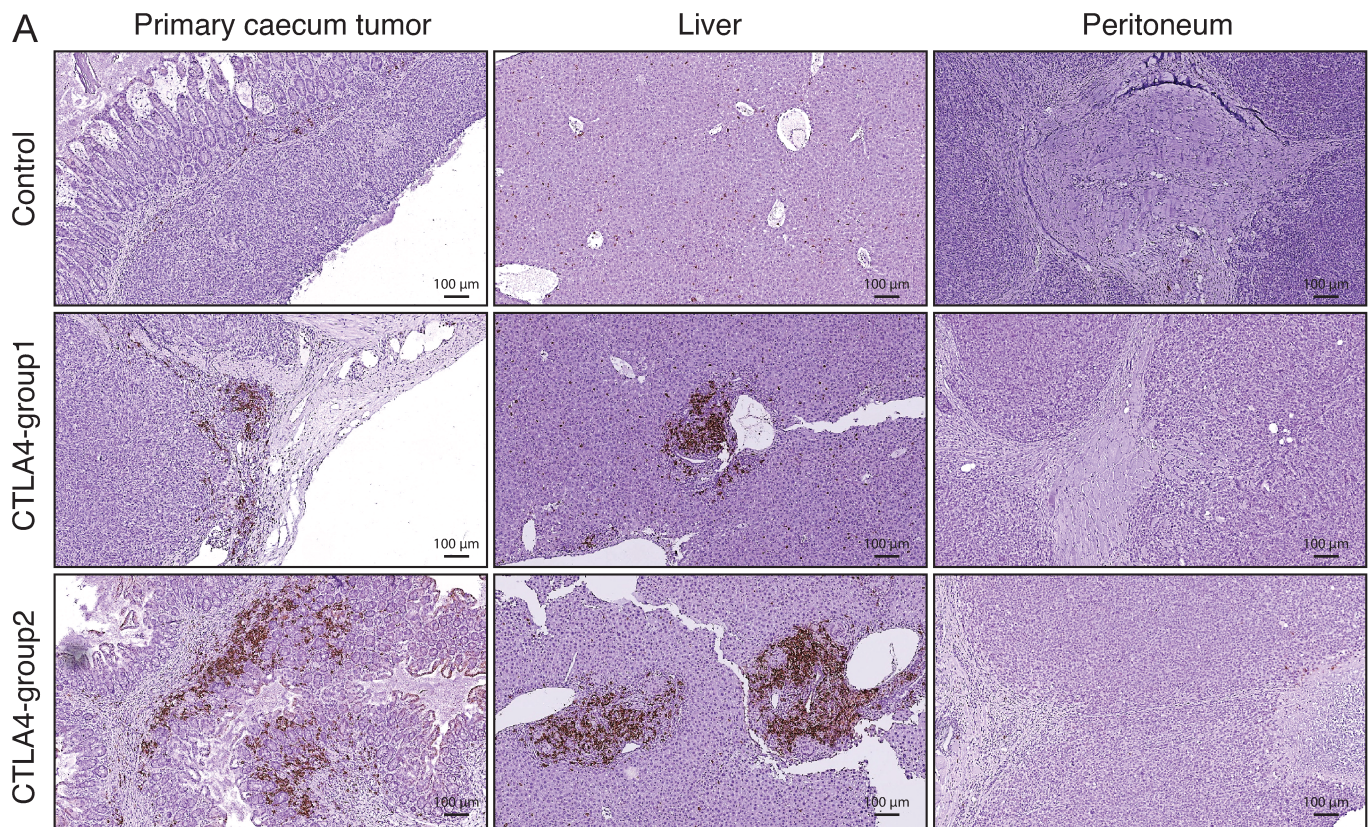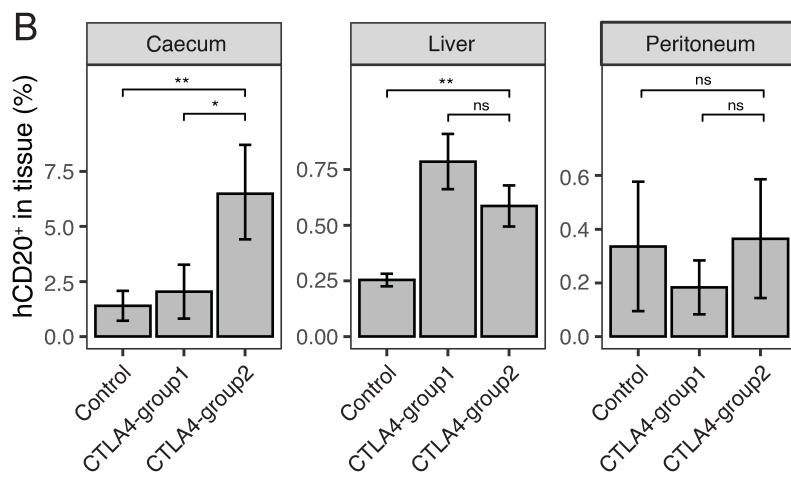

Supplement: jitc-2022-005345supp008_data_supplement.pdf [file jitc-2022-005345supp008_data_supplement.pdf]

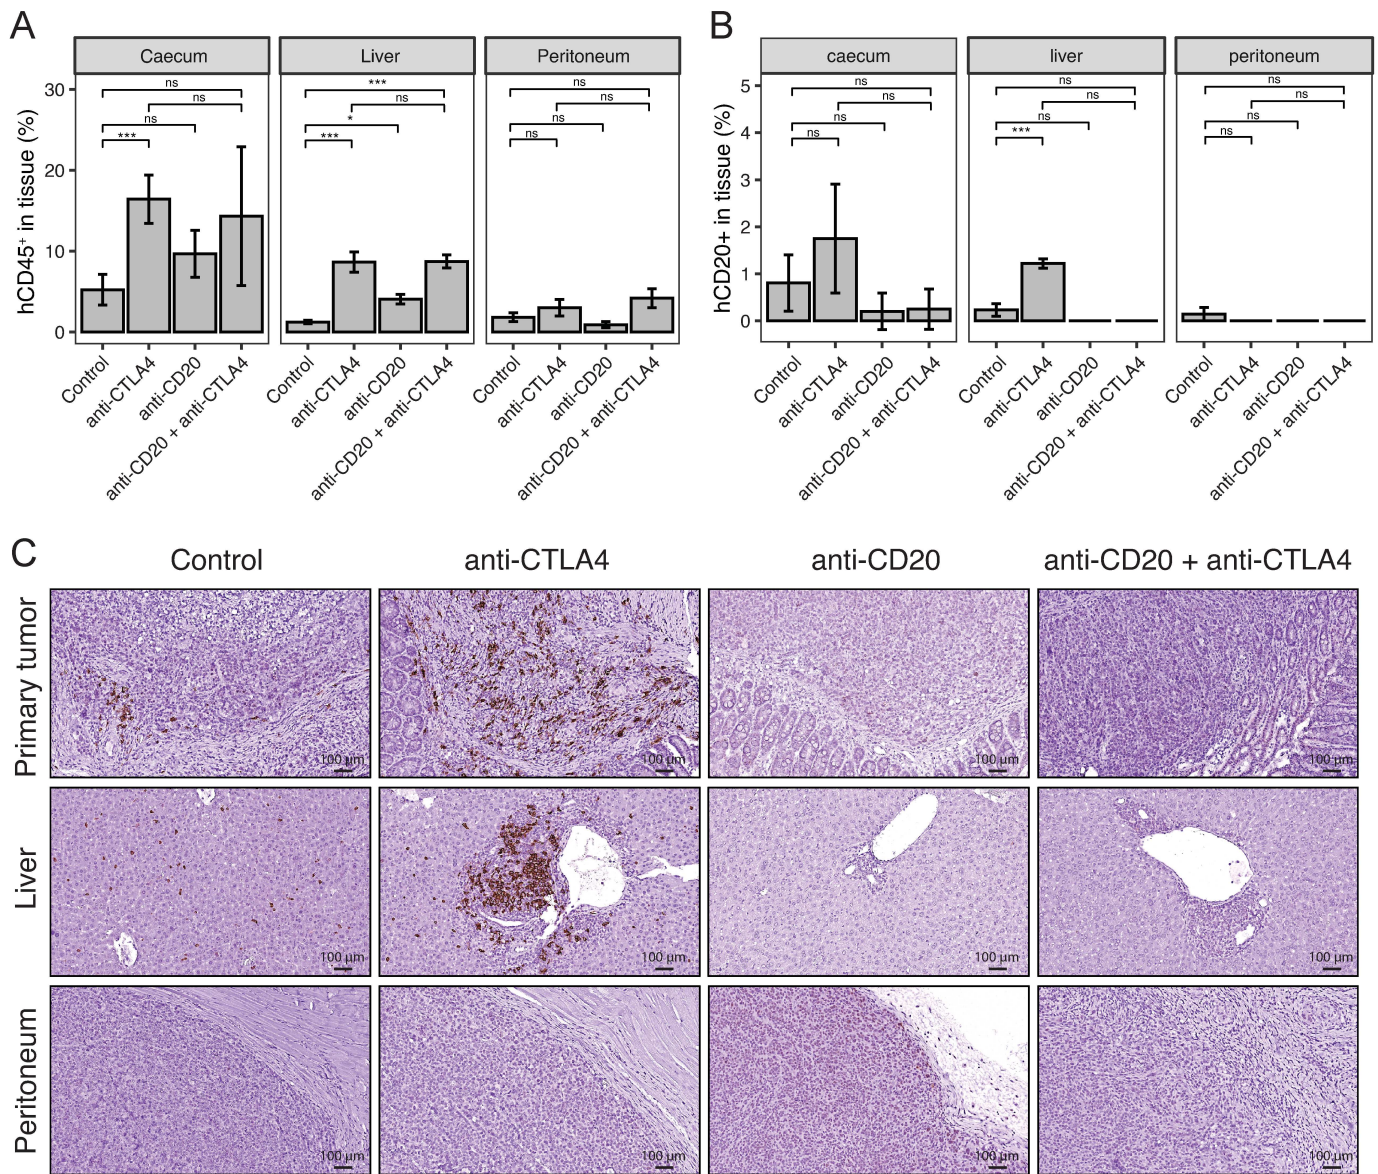

Supplement: jitc-2022-005345supp009_data_supplement.pdf [file jitc-2022-005345supp009_data_supplement.pdf]
